# Supplementary material for: The N-Terminal Region of the Polo Kinase Cdc5 Is Required for Downregulation of the Meiotic Recombination Checkpoint
Source: MDPI journal article supplement (doi:10.3390/cells10102561), 2021-09-27
Supplement: s1 [file s1]

## **SUPPLEMENTAL INFORMATION**

### **The N-terminal region of the polo kinase Cdc5 is required for downregulation of the meiotic recombination checkpoint**

Sara González-Arranz<sup>1, #</sup>, Isabel Acosta<sup>1, #</sup>, Jesús A. Carballo<sup>3</sup>, Beatriz Santos<sup>1,2</sup> and Pedro A. San-Segundo<sup>1,\*</sup>

<sup>1</sup>Instituto de Biología Funcional y Genómica (IBFG). Consejo Superior de Investigaciones Científicas (CSIC) and University of Salamanca. 37007-Salamanca, Spain

<sup>2</sup>Departamento de Microbiología y Genética. University of Salamanca. 37007-Salamanca, Spain.

<sup>3</sup>Department of Cellular and Molecular Biology. Centro de Investigaciones Biológicas Margarita Salas. Consejo Superior de Investigaciones Científicas (CSIC). 28040-Madrid, Spain

<sup>#</sup>These authors contributed equally to this work

\*Correspondence: [pedross@usal.es](mailto:pedross@usal.es)

#### **Supplemental Figures (Figures S1-S2)**

**Table S1 (Plasmids list)**

**Table S2 (Strains list)**

**Table S3 (Strains used in Figures)**

**Table S4 (Antibodies list)**

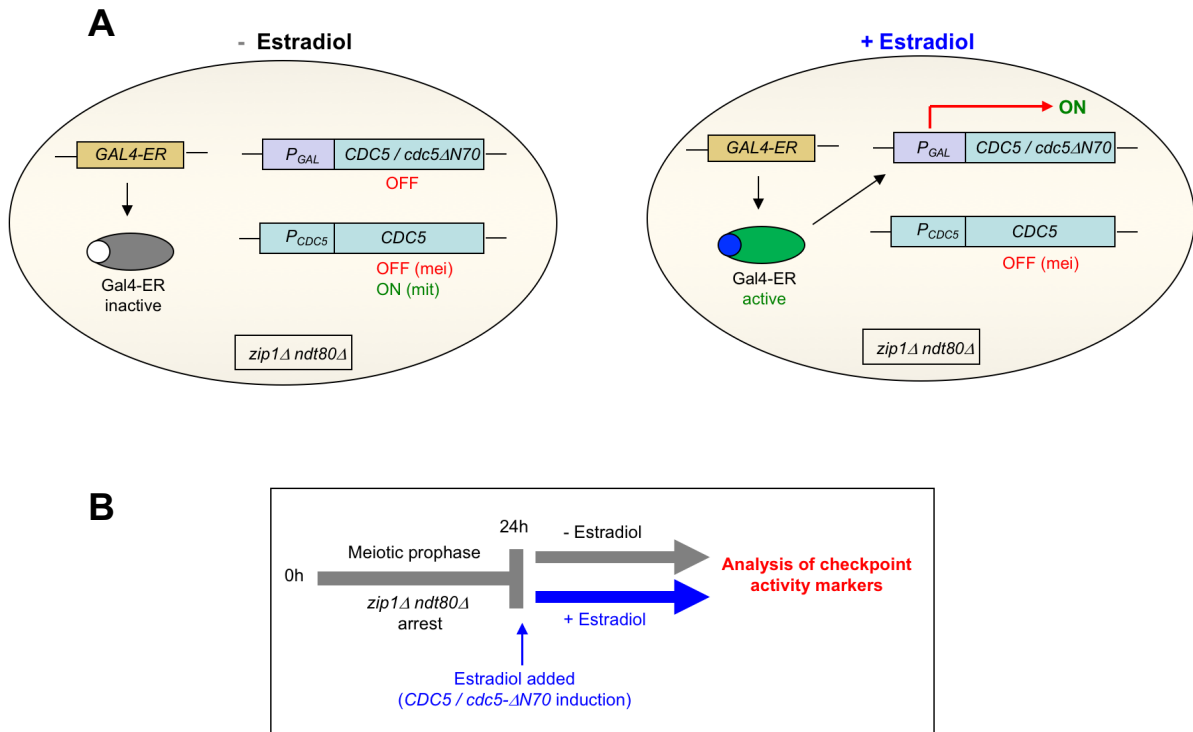

**Figure S1. The *CDC5*-inducible system by estradiol (*CDC5-IN*).**

(A) Schematic representation of the *CDC5-IN* system used to explore the impact of Cdc5 or Cdc5- $\Delta$ N70 on the inactivation of the meiotic checkpoint induced by *ZIP1* deficiency. The strains utilized carry *ZIP1* deletion; therefore, the checkpoint is triggered, and also carry *NDT80* deletion; therefore, they arrest permanently in prophase I. The absence of Ndt80 also prevents the meiotic expression of the endogenous *CDC5* gene. These strains also harbor a version of the Gal4 transcriptional inducible fused to an estradiol receptor (*GAL4-ER*). In the absence of estradiol, Gal4-ER is inactive, but upon estradiol addition it activates the *GAL1* promoter (*P<sub>GAL</sub>*). Besides the endogenous *CDC5* gene driven by its own promoter (*P<sub>CDC5</sub>*), the strains also contain an additional copy of the *CDC5* gene (or *cdc5- $\Delta$ N70*) controlled by the *P<sub>GAL</sub>* promoter. Although Cdc5 is essential for viability, the presence of the endogenous *P<sub>CDC5</sub>-CDC5* gene supports mitotic growth (mit). However, *ndt80 $\Delta$*  meiotic cells (mei) in the absence of estradiol (left) express neither *P<sub>CDC5</sub>-CDC5* nor *P<sub>GAL</sub>-CDC5/cdc5- $\Delta$ N70* genes. Addition of estradiol to the medium (right) triggers *P<sub>GAL</sub>-CDC5/cdc5- $\Delta$ N70* expression allowing us to study exclusively the effect of Cdc5 (or Cdc5- $\Delta$ N70) without interference from cell cycle progression or from the impact of other targets of Ndt80.

(B) The scheme depicts the experimental setup employed in Figure 5 to analyze checkpoint activity with the *CDC5-IN* system.

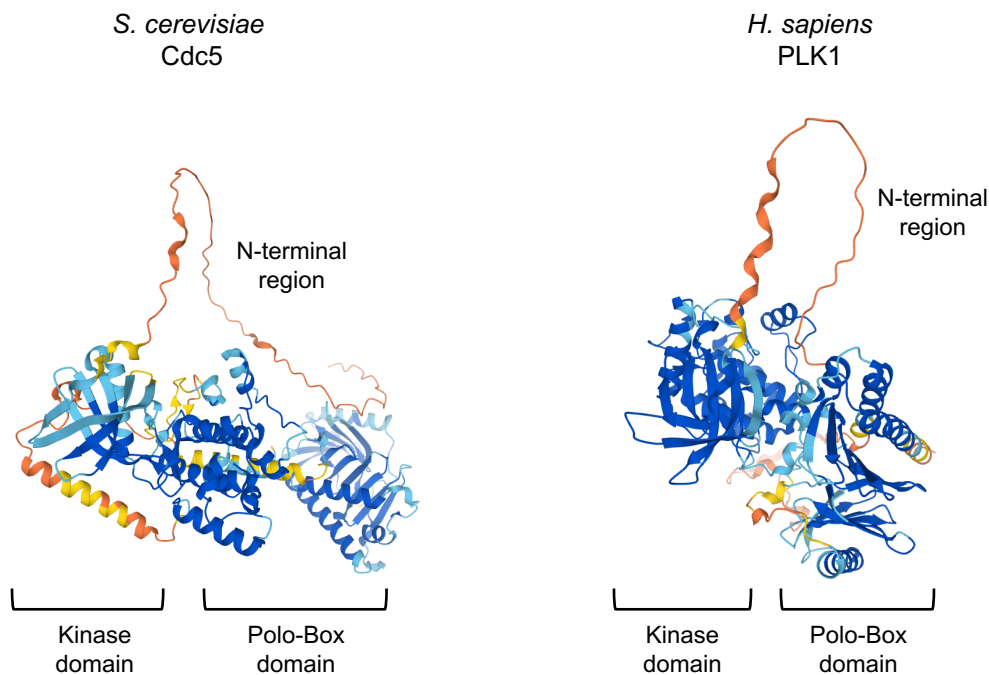

**Figure S2. Predicted structure of Cdc5 and PLK1.**

Structure prediction of polo-like kinases from budding yeast (Cdc5) and human (PLK1) using the high-accurate AlphaFold DB tool (<https://alphafold.ebi.ac.uk/>). The largely unstructured N-terminal domain of both proteins appears in orange color.

**Table S1. Plasmids.**

| Plasmid            | Vector | Relevant parts                                                                                 | Source/Reference            |
|--------------------|--------|------------------------------------------------------------------------------------------------|-----------------------------|
| pRS426             | -      | <i>2<math>\mu</math> URA3</i>                                                                  | (Christianson et al., 1992) |
| pJC29              | pRS426 | <i>2<math>\mu</math> URA3 HA-CDC5</i>                                                          | (Jaspersen et al., 1998)    |
| pSS122             | pRS426 | <i>2<math>\mu</math> URA3 HA-cdc5-<math>\Delta</math>N70</i>                                   | This work                   |
| pSS252             | pSK+   | <i>HA-CDC5</i>                                                                                 | This work                   |
| pSS253             | pSK+   | <i>HA-cdc5-<math>\Delta</math>N70</i>                                                          | This work                   |
| pSS254             | pSK+   | <i>HA-CDC5-natMX4</i>                                                                          | This work                   |
| pSS255             | pSK+   | <i>HA-cdc5-<math>\Delta</math>N70-natMX4</i>                                                   | This work                   |
| pSS308             | pRS426 | <i>2<math>\mu</math> URA3 cdc5-T23A</i>                                                        | This work                   |
| pSS309             | pRS426 | <i>2<math>\mu</math> URA3 cdc5-T70A</i>                                                        | This work                   |
| pSS310             | pRS426 | <i>2<math>\mu</math> URA3 cdc5-S18A</i>                                                        | This work                   |
| pSS311             | pRS426 | <i>2<math>\mu</math> URA3 cdc5-T29A</i>                                                        | This work                   |
| pSS359             | pSK+   | <i>HA-cdc5-db7A-natMX4</i>                                                                     | This work                   |
| pSS360             | pRS426 | <i>2<math>\mu</math> URA3 HA-cdc5-db7A</i>                                                     | This work                   |
| pMJ998<br>(pSS356) | pBR322 | <i>natMX4—P<sub>GPD1</sub>-GAL4(1-848)ER—<br/>P<sub>GAL1</sub>-CDC5</i>                        | M. Lichten                  |
| pSS425             | pBR322 | <i>natMX4—P<sub>GPD1</sub>-GAL4(1-848)ER—<br/>P<sub>GAL1</sub>-cdc5-<math>\Delta</math>N70</i> | This work                   |

Christianson, T.W., R.S. Sikorski, M. Dante, J.H. Shero, and P. Hieter. 1992. Multifunctional yeast high-copy-number shuttle vectors. *Gene*. 110:119-122.

Jaspersen, S.L., J.F. Charles, R.L. Tinker-Kulberg, and D.O. Morgan. 1998. A late mitotic regulatory network controlling cyclin destruction in *Saccharomyces cerevisiae*. *Mol Biol Cell*. 9:2803-2817.

**Table S2. *Saccharomyces cerevisiae* strains**

| Strain | Genotype*                                                                                                                                                              | Source    |
|--------|------------------------------------------------------------------------------------------------------------------------------------------------------------------------|-----------|
| DP421  | <i>MATa/MAT<math>\alpha</math> leu2-3,112 his4-260 thr1-4 trp1-289 ura3-1 ade2-1 lys2<math>\Delta</math>Nhel</i>                                                       | PSS Lab   |
| DP422  | DP421 <i>zip1<math>\Delta</math>::LYS2</i>                                                                                                                             | PSS Lab   |
| DP1094 | DP421 <i>HA-CDC5-natMX4</i>                                                                                                                                            | This work |
| DP1095 | DP421 <i>HA-cdc5-<math>\Delta</math>N70-natMX4</i>                                                                                                                     | This work |
| DP1115 | DP421 <i>HA-CDC5-natMX4 zip1<math>\Delta</math>::LYS2</i>                                                                                                              | This work |
| DP1116 | DP421 <i>HA-cdc5-<math>\Delta</math>N70-natMX4 zip1<math>\Delta</math>::LYS2</i>                                                                                       | This work |
| DP1489 | DP421 <i>HA-cdc5-db7A-natMX4</i>                                                                                                                                       | This work |
| DP1490 | DP421 <i>HA-cdc5-db7A-natMX4 zip1<math>\Delta</math>::LYS2</i>                                                                                                         | This work |
| DP1711 | <i>DP421 P<sub>CDC5</sub>-CDC5—GAL4(ER)—natMX4—P<sub>GAL1</sub>-CDC5 3MYC-SWE1 zip1<math>\Delta</math>::LYS2 ndt80<math>\Delta</math>::LEU2</i>                        | This work |
| DP1711 | <i>DP421 P<sub>CDC5</sub>-CDC5—GAL4(ER)—natMX4—P<sub>GAL1</sub>-cdc5-<math>\Delta</math>N70 3MYC-SWE1 zip1<math>\Delta</math>::LYS2 ndt80<math>\Delta</math>::LEU2</i> | This work |
| JC34   | (W303) <i>MATa ura3-1 leu2-3,112 his3-11 trp1-1 ade2-1 can1-100 bar1<math>\Delta</math>::hisG cdc5-1</i>                                                               | D. Morgan |

\*All strains, except JC34, are diploids isogenic to BR1919 and homozygous for the indicated markers. DP421 is a *lys2* version of the original BR1919-2N (Rockmill and Roeder, 1990).

Rockmill, B., and G.S. Roeder. 1990. Meiosis in asynaptic yeast. *Genetics*. 126:563-574.

**Table S3. Strains and plasmids used in Figure panels**

Please, refer to Table S1 and Table S2 for plasmid details and full strain genotypes.

**Figure 1B and 1D**

| Relevant genotype         | Strain name / Plasmid name |
|---------------------------|----------------------------|
| wild type                 | DP421 / pRS426             |
| <i>zip1Δ</i>              | DP422 / pRS426             |
| <i>zip1Δ OE-CDC5</i>      | DP422 / pJC29              |
| <i>zip1Δ OE-cdc5-ΔN70</i> | DP422 / pSS122             |
| <i>zip1Δ OE-cdc5-db7A</i> | DP422 / pSS360             |

**Figure 1C**

| Relevant genotype       | Strain name / Plasmid name |
|-------------------------|----------------------------|
| <i>cdc5-1</i>           | JC34 / pRS426              |
| <i>cdc5-1 OE-CDC5</i>   | JC34 / pJC29               |
| <i>cdc5-1 cdc5-ΔN70</i> | JC34 / pSS122              |

**Figure 2A and 2B**

| Relevant genotype         | Strain name / Plasmid name |
|---------------------------|----------------------------|
| <i>zip1Δ</i>              | DP422 / pRS426             |
| <i>zip1Δ OE-CDC5</i>      | DP422 / pJC29              |
| <i>zip1Δ OE-cdc5-S18A</i> | DP422 / pSS310             |
| <i>zip1Δ OE-cdc5-T23A</i> | DP422 / pSS308             |
| <i>zip1Δ OE-cdc5-T29A</i> | DP422 / pSS311             |
| <i>zip1Δ OE-cdc5-T70A</i> | DP422 / pSS309             |

**Figure 3**

| Relevant genotype | Strain name |
|-------------------|-------------|
| wild type         | DP1094      |
| <i>cdc5-ΔN70</i>  | DP1095      |
| <i>cdc5-db7A</i>  | DP1489      |

**Figure 4**

| Relevant genotype      | Strain name |
|------------------------|-------------|
| wild type              | DP1094      |
| <i>zip1Δ</i>           | DP1115      |
| <i>zip1Δ cdc5-ΔN70</i> | DP1116      |
| <i>zip1Δ cdc5-db7A</i> | DP1490      |

**Figure 5**

| Relevant genotype                | Strain name |
|----------------------------------|-------------|
| <i>zip1Δ ndt80Δ CDC5-IN</i>      | DP1711      |
| <i>zip1Δ ndt80Δ cdc5-ΔN70-IN</i> | DP1801      |

**Table S4. Primary antibodies**

| Antibody      | Host and type     | Dilution | Source / Reference                  |
|---------------|-------------------|----------|-------------------------------------|
| Hop1-T318-ph  | Rabbit polyclonal | 1:1000   | (Penedos et al., 2015)              |
| H3-T11-ph     | Rabbit polyclonal | 1:2000   | Abcam<br>ab5168                     |
| Pgk1 (22C5D8) | Mouse monoclonal  | 1:5000   | Molecular Probes<br>459250          |
| Red1          | Rabbit polyclonal | 1:1000   | (Smith and Roeder, 1997)            |
| Mek1          | Rabbit polyclonal | 1:1000   | (Ontoso et al., 2013)               |
| Ndt80         | Rabbit polyclonal | 1:5000   | (Benjamin et al., 2003)             |
| Cdc5          | Goat polyclonal   | 1:1000   | Santa Cruz Biotechnology<br>sc-6733 |

Benjamin, K.R., C. Zhang, K.M. Shokat, and I. Herskowitz. 2003. Control of landmark events in meiosis by the CDK Cdc28 and the meiosis-specific kinase Ime2. *Genes Dev.* 17:1524-1539.

Ontoso, D., I. Acosta, F. van Leeuwen, R. Freire, and P.A. San-Segundo. 2013. Dot1-dependent histone H3K79 methylation promotes activation of the Mek1 meiotic checkpoint effector kinase by regulating the Hop1 adaptor. *PLoS Genet.* 9:e1003262.

Penedos, A., A.L. Johnson, E. Strong, A.S. Goldman, J.A. Carballo, and R.S. Cha. 2015. Essential and checkpoint functions of budding yeast ATM and ATR during meiotic prophase are facilitated by differential phosphorylation of a meiotic adaptor protein, Hop1. *PLoS One.* 10:e0134297.

Smith, A.V., and G.S. Roeder. 1997. The yeast Red1 protein localizes to the cores of meiotic chromosomes. *J Cell Biol.* 136:957-967.
